# Supplementary material for: A Retrospective Observational Analysis of Italian Reimbursed Healthcare for Patients on Hemodialysis and Treated for Chronic Kidney Disease-Associated Pruritus
Source: Research Square preprint supplement (doi:10.21203/rs.3.rs-1196990/v1), 2022-02-15
Supplement: Supplementary file 1 [file 348c483a533ee636c3742662.pdf]

## SUPPLEMENTARY MATERIAL

Supplementary table 1 - Identification criteria of patients affected by potentially confounding diseases, such as those that can frequently cause pruritus, in order to be excluded. The presence of at least one of the following codes per disease, implies that the patient is affected by the disease.

| Healthcare administrative database  | Description                                                                                                                                                                                                                                                                                                                                                                                                                                                                                                                                                                                                                                                                                                                                                                                                                                                                                                                                                                                                                                                                                                                                                   |
|-------------------------------------|---------------------------------------------------------------------------------------------------------------------------------------------------------------------------------------------------------------------------------------------------------------------------------------------------------------------------------------------------------------------------------------------------------------------------------------------------------------------------------------------------------------------------------------------------------------------------------------------------------------------------------------------------------------------------------------------------------------------------------------------------------------------------------------------------------------------------------------------------------------------------------------------------------------------------------------------------------------------------------------------------------------------------------------------------------------------------------------------------------------------------------------------------------------|
| Chronic liver disease and cirrhosis |                                                                                                                                                                                                                                                                                                                                                                                                                                                                                                                                                                                                                                                                                                                                                                                                                                                                                                                                                                                                                                                                                                                                                               |
| Hospitalizations                    | Hospital discharge form with primary or secondary diagnosis of (ICD-9-CM code)::<br>571.x - Chronic liver disease and cirrhosis<br>572.x - Liver abscess and sequelae of chronic liver disease<br>573.x - Other disorders of liver<br>V42.7 - Liver replaced by transplant                                                                                                                                                                                                                                                                                                                                                                                                                                                                                                                                                                                                                                                                                                                                                                                                                                                                                    |
| Disease cost exemption              | 016 - Chronic liver disease (active)<br>008 - Cirrhosis                                                                                                                                                                                                                                                                                                                                                                                                                                                                                                                                                                                                                                                                                                                                                                                                                                                                                                                                                                                                                                                                                                       |
| Systemic lupus erythematosus        |                                                                                                                                                                                                                                                                                                                                                                                                                                                                                                                                                                                                                                                                                                                                                                                                                                                                                                                                                                                                                                                                                                                                                               |
| Hospitalizations                    | Hospital discharge form with primary or secondary diagnosis of (ICD-9-CM code)::<br>710.0 - Systemic lupus erythematosus                                                                                                                                                                                                                                                                                                                                                                                                                                                                                                                                                                                                                                                                                                                                                                                                                                                                                                                                                                                                                                      |
| Disease cost exemption              | 028 - Systemic lupus erythematosus                                                                                                                                                                                                                                                                                                                                                                                                                                                                                                                                                                                                                                                                                                                                                                                                                                                                                                                                                                                                                                                                                                                            |
| Arterial vasculitis                 |                                                                                                                                                                                                                                                                                                                                                                                                                                                                                                                                                                                                                                                                                                                                                                                                                                                                                                                                                                                                                                                                                                                                                               |
| Hospitalizations                    | Hospital discharge form with primary or secondary diagnosis of (ICD-9-CM code)::<br>440.x - Atherosclerosis<br>441.x - Aortic aneurysm and dissection<br>442.x - Other aneurysm<br>443.1 - Thromboangiitis obliterans [Buerger's disease]<br>443.2x - Other arterial dissection<br>444.x - Arterial embolism and thrombosis<br>445.x - Atheroembolism<br>447.x - Other disorders of arteries and arterioles<br><br>and/or<br>Hospital discharge form with one of the following procedures (ICD-9-CM code)::<br>39.24 - Aorta-renal bypass<br>39.25 - Aorta-iliac-femoral bypass<br>39.26 - Other intra-abdominal vascular shunt or bypass<br>39.50 - Angioplasty or atherectomy of other non-coronary vessel(s)<br>39.51 - Clipping of aneurysm<br>39.52 - Other repair of aneurysm<br>39.54 - Re-entry operation (aorta)<br>39.56 - Repair of blood vessel with tissue patch graft<br>39.57 - Repair of blood vessel with synthetic patch graft<br>39.58 - Repair of blood vessel with unspecified type of patch graft<br>39.71 - Endovascular implantation of graft in abdominal aorta<br>39.72 - Endovascular repair or occlusion of head and neck vessels |

|                                                                          |                                                                                                                                                                                                                                                                                                                                                                                                                                                                                                                                                                                                                                                                                                                                                                                                                                                                                          |
|--------------------------------------------------------------------------|------------------------------------------------------------------------------------------------------------------------------------------------------------------------------------------------------------------------------------------------------------------------------------------------------------------------------------------------------------------------------------------------------------------------------------------------------------------------------------------------------------------------------------------------------------------------------------------------------------------------------------------------------------------------------------------------------------------------------------------------------------------------------------------------------------------------------------------------------------------------------------------|
|                                                                          | 39.73 - Endovascular implantation of graft in thoracic aorta<br>39.74 - Endovascular removal of obstruction from head and neck vessel(s)<br>39.79 - Other endovascular repair (of aneurysm) of other vessels<br>39.90 - Insertion of non-drug-eluting peripheral vessel stent(s)                                                                                                                                                                                                                                                                                                                                                                                                                                                                                                                                                                                                         |
| Disease cost exemption                                                   | 002.440 - Diseases of the circulatory system - Atherosclerosis<br>002.441.2 - Diseases of the circulatory system - Thoracic aneurysm without mention of rupture<br>002.441.4 - Diseases of the circulatory system - Abdominal aneurysm without mention of rupture<br>002.441.7 - Diseases of the circulatory system - Thoracoabdominal aneurysm, without mention of rupture<br>002.441.9- Diseases of the circulatory system - Aortic aneurysm of unspecified site without mention of rupture<br>002.442 - Diseases of the circulatory system - Other aneurysm<br>002.444 - Diseases of the circulatory system - Arterial embolism and thrombosis<br>002.447.0 - Diseases of the circulatory system - Arteriovenous fistula, acquired<br>002.447.1 - Diseases of the circulatory system - Stricture of artery<br>002.447.6 - Diseases of the circulatory system - Arteritis, unspecified |
| Diseases and inflammatory conditions of the skin and subcutaneous tissue |                                                                                                                                                                                                                                                                                                                                                                                                                                                                                                                                                                                                                                                                                                                                                                                                                                                                                          |
| Hospitalizations                                                         | Hospital discharge form with primary or secondary diagnosis of (ICD-9-CM code):<br>690 - Erythematous squamous dermatosis<br>691 - Atopic dermatitis and related conditions<br>692 - Contact dermatitis and other eczema<br>693 - Dermatitis due to substances taken internally<br>694 - Bullous dermatoses<br>695 - Erythematous conditions<br>696 - Psoriasis and similar disorders<br>697 - Lichen<br>708 - Urticaria                                                                                                                                                                                                                                                                                                                                                                                                                                                                 |

Supplementary table 2 - Identification criteria of patients treated with chronic kidney disease-associated pruritus-related treatments: at least one of the following criteria among pharmaceuticals and the outpatient specialist service had to be met in 180 days before and after index date.

| Healthcare administrative database | Description                                                                                                                                                                                                                     |
|------------------------------------|---------------------------------------------------------------------------------------------------------------------------------------------------------------------------------------------------------------------------------|
| Pharmaceuticals                    | Supply of one of the following CKD-aP related treatments (ATC code):<br>N03AX12 – gabapentin<br>N03AX16 - pregabalin<br>L04AX02 – thalidomide<br>R06 - antihistamines for systemic use (in absence of antineoplastic therapy *) |
| Outpatient specialist service      | Performance of (current Italian classification):<br>99.82 – ultraviolet light therapy (Actinotherapy, UV Phototherapy)                                                                                                          |
| Hospitalizations                   | Hospital discharge form with (ICD-9-CM code):<br>99.82 – ultraviolet light therapy (Actinotherapy, UV Phototherapy)                                                                                                             |

\* Antineoplastic therapy had to meet at least one of the following criteria:

| Healthcare administrative database | Description                                                                                                                                                                                                                                                                                             |
|------------------------------------|---------------------------------------------------------------------------------------------------------------------------------------------------------------------------------------------------------------------------------------------------------------------------------------------------------|
| Hospitalizations                   | Hospital discharge form with one of the following procedures (ICD-9-CM code):<br>00.10 - Implantation of chemotherapeutic agent<br>99.25 - Injection or infusion of cancer chemotherapeutic substance<br>99.28 - Injection or infusion of biological response modifier [BRM] as an antineoplastic agent |
| Outpatient specialist service      | Performance of (current Italian classification):<br>99.25 - Injection or infusion of cancer chemotherapeutic substance                                                                                                                                                                                  |
| Pharmaceuticals                    | Prescription of at least a specific drug (ATC code):<br>L01 – Antineoplastic agents                                                                                                                                                                                                                     |

Supplementary table 3 – Identification criteria of potential chronic kidney disease-associated pruritus-related comorbidities and other comorbidities of interest in 2 years before the index date. The presence of at least one of the following codes per comorbidity, implies that the patient is affected by the comorbidity.

| Healthcare administrative database     | Description                                                                                                                                                                 |
|----------------------------------------|-----------------------------------------------------------------------------------------------------------------------------------------------------------------------------|
| Potential CKD-aP-related comorbidities |                                                                                                                                                                             |
| Anemia                                 |                                                                                                                                                                             |
| Hospitalizations                       | Hospital discharge form with primary or secondary diagnosis of (ICD-9-CM code):<br>285.21 - Anemia in chronic kidney disease                                                |
| Pharmaceuticals                        | Supply of at least one of the following drugs (ATC code):<br>B03A - Iron preparations<br>B03XA - Other antianemic preparations                                              |
| Xerosis cutis                          |                                                                                                                                                                             |
| Hospitalizations                       | Hospital discharge form with primary or secondary diagnosis of (ICD-9-CM code):<br>706.8- Other specified diseases of sebaceous glands                                      |
| Hyperparathyroidism                    |                                                                                                                                                                             |
| Hospitalizations                       | Hospital discharge form with primary or secondary diagnosis of (ICD-9-CM code):<br>588.81 - Secondary hyperparathyroidism (of renal origin)<br>252.0x – Hyperparathyroidism |
| Pharmaceuticals                        | Supply of at least one of the following drugs (ATC code):<br>H05BX01 – Cinacalcet<br>H05BX02 – Paricalcitol<br>H05BX04 - Etelcalcetide                                      |
| Disease cost exemption                 | 026.252.0 - Hyperparathyroidism                                                                                                                                             |
| Hypercalcemia                          |                                                                                                                                                                             |
| Hospitalizations                       | Hospital discharge form with primary or secondary diagnosis of (ICD-9-CM code):<br>275.42 - Hypercalcemia                                                                   |
| Hypothyroidism                         |                                                                                                                                                                             |
| Hospitalizations                       | Hospital discharge form primary or secondary diagnosis of (ICD-9-CM code):<br>243.x - Congenital hypothyroidism<br>244.x - Acquired hypothyroidism                          |
| Disease cost exemption                 | 027 – Hypothyroidism                                                                                                                                                        |
| Pharmaceuticals                        | At least one supply of the following drug (ATC code):<br>H03AA - Thyroid hormones                                                                                           |
| Hyperuricemia                          |                                                                                                                                                                             |
| Hospitalizations                       | Hospital discharge form primary or secondary diagnosis of (ICD-9-CM code):                                                                                                  |

|                                 |                                                                                                                                                                                                                                                                                                                                                                                                                                        |
|---------------------------------|----------------------------------------------------------------------------------------------------------------------------------------------------------------------------------------------------------------------------------------------------------------------------------------------------------------------------------------------------------------------------------------------------------------------------------------|
|                                 | 790.6 - Other abnormal blood chemistry                                                                                                                                                                                                                                                                                                                                                                                                 |
| Pharmaceuticals                 | At least one supply of the following drug (ATC code):<br>M04AA - Preparations inhibiting uric acid production                                                                                                                                                                                                                                                                                                                          |
| Hyperphosphatemia               |                                                                                                                                                                                                                                                                                                                                                                                                                                        |
| Hospitalizations                | Hospital discharge form primary or secondary diagnosis of (ICD-9-CM code):<br>275.3 - Disorders of phosphorus metabolism                                                                                                                                                                                                                                                                                                               |
| Pharmaceuticals                 | Supply of at least one of the following drugs (ATC code):<br>V03AE02 – sevelamer<br>V03AE03 - lanthanum carbonate<br>V03AE04 - calcium acetate and magnesium carbonate<br>V03AE05 - sucroferric oxyhydroxide                                                                                                                                                                                                                           |
| Other comorbidities of interest |                                                                                                                                                                                                                                                                                                                                                                                                                                        |
| Diabetes mellitus               |                                                                                                                                                                                                                                                                                                                                                                                                                                        |
| Hospitalizations                | Hospital discharge form with primary or secondary diagnosis of (ICD-9-CM code):<br>250.x - Diabetes mellitus                                                                                                                                                                                                                                                                                                                           |
| Disease cost exemption          | 013 - Diabetes mellitus                                                                                                                                                                                                                                                                                                                                                                                                                |
| Pharmaceuticals                 | At least one supply of the following drug (ATC code):<br>A10 – drugs used in diabetes                                                                                                                                                                                                                                                                                                                                                  |
| Depression                      |                                                                                                                                                                                                                                                                                                                                                                                                                                        |
| Hospitalizations                | Hospital discharge form with primary or secondary diagnosis of (ICD-9-CM code):<br>296.2x - Major depressive disorder single episode<br>296.3x - Major depressive disorder recurrent episode<br>296.5x - Bipolar disorder, most recent episode (or current) depressed<br>296.82 - Atypical depressive disorder<br>298.0x - Depressive type psychosis<br>300.4 - Dysthymic disorder<br>301.12 - Chronic depressive personality disorder |
| Disease cost exemption          | 044.296.2 - Psychosis (major depressive disorder single episode)<br>044.296.3 - Psychosis (major depressive disorder recurrent episode)<br>044.296.5 - Psychosis (bipolar disorder, most recent episode (or current) depressed)<br>044.296.8 - Psychosis (manic depressive psychosis, other unspecified)<br>044.298.0 – Psychosis (depressive type psychosis)                                                                          |
| Pharmaceuticals                 | Supply of at least four packs of the following drugs (ATC code):<br>N06A– Antidepressants                                                                                                                                                                                                                                                                                                                                              |
| Hypertension                    |                                                                                                                                                                                                                                                                                                                                                                                                                                        |
| Hospitalizations                | Hospital discharge form with primary or secondary diagnosis of (ICD-9-CM code):<br>401.x - Essential hypertension<br>402.x - Hypertensive heart disease<br>403.x - Hypertensive chronic kidney disease<br>404.x - Hypertensive heart and chronic kidney disease<br>405.x - Secondary hypertension                                                                                                                                      |

|                         |                                                                                                                                                                                                                                                                                                                                                                                                                                                                                                                                    |
|-------------------------|------------------------------------------------------------------------------------------------------------------------------------------------------------------------------------------------------------------------------------------------------------------------------------------------------------------------------------------------------------------------------------------------------------------------------------------------------------------------------------------------------------------------------------|
| Disease cost exemption  | 031 – hypertension<br>A31 – hypertension without organ damage                                                                                                                                                                                                                                                                                                                                                                                                                                                                      |
| Pharmaceuticals         | Supply of at least four packs of the following drugs (ATC code):<br>C02 - antihypertensive<br>C03 - diuretics<br>C07 - beta blocking agents<br>C08 - calcium channel blockers<br>C09 – agents acting on the renin-angiotensin system                                                                                                                                                                                                                                                                                               |
| Viral hepatopathies     |                                                                                                                                                                                                                                                                                                                                                                                                                                                                                                                                    |
| Hospitalizations        | Hospital discharge form with primary or secondary diagnosis of (ICD-9-CM code):<br>070.x - Viral hepatitis                                                                                                                                                                                                                                                                                                                                                                                                                         |
| Pharmaceuticals         | Supply of at least one of the following drugs specific for liver diseases (ATC code):<br>J05AP - antivirals for treatment of HCV infections<br>J05AF08 – adefovir<br>J05AF10 – entecavir<br>J05AF11 – telbivudina                                                                                                                                                                                                                                                                                                                  |
| Coronary artery disease |                                                                                                                                                                                                                                                                                                                                                                                                                                                                                                                                    |
| Hospitalizations        | Hospitalization with primary or secondary diagnosis of (ICD-9-CM code):<br>410.x - Acute myocardial infarction<br>411.x - Other acute and subacute forms of ischemic heart disease<br>412 - Old myocardial infarction<br>413.x - Angina pectoris<br>414.x - Other forms of chronic ischemic heart disease<br><br>and/or<br>Hospitalization with one of the following procedures (ICD-9-CM code):<br>36.x - Operations on vessels of heart<br>00.66 - Percutaneous transluminal coronary angioplasty [PTCA] or coronary atherectomy |
